# Supplementary material
Source: MDPI journal article supplement (https://www.mdpi.com/2624-862X/4/1/8)
Supplement: s1 [file s1]

**Table S1:** Milk formulation targets

| <b>Yogurt<br/>formulation</b> | <b>Fat<br/>content<br/>(% w/w)</b> | <b>Total solids<br/>(% w/w)</b> | <b>Total solids<br/>not-fat<br/>(% w/w)</b> | <b>Lactose<br/>content<br/>(% w/w)</b> |
|-------------------------------|------------------------------------|---------------------------------|---------------------------------------------|----------------------------------------|
| YC                            | 0                                  | 14.0                            | 14                                          | 9.8                                    |
| Y0.0                          | 0                                  | 16.5                            | 16.5                                        | 12.3                                   |
| Y1.3                          | 1.3                                | 16.5                            | 15.2                                        | 11                                     |
| Y2.6                          | 2.6                                | 16.5                            | 13.9                                        | 9.7                                    |
| Y3.9                          | 3.9                                | 16.5                            | 12.6                                        | 8.4                                    |

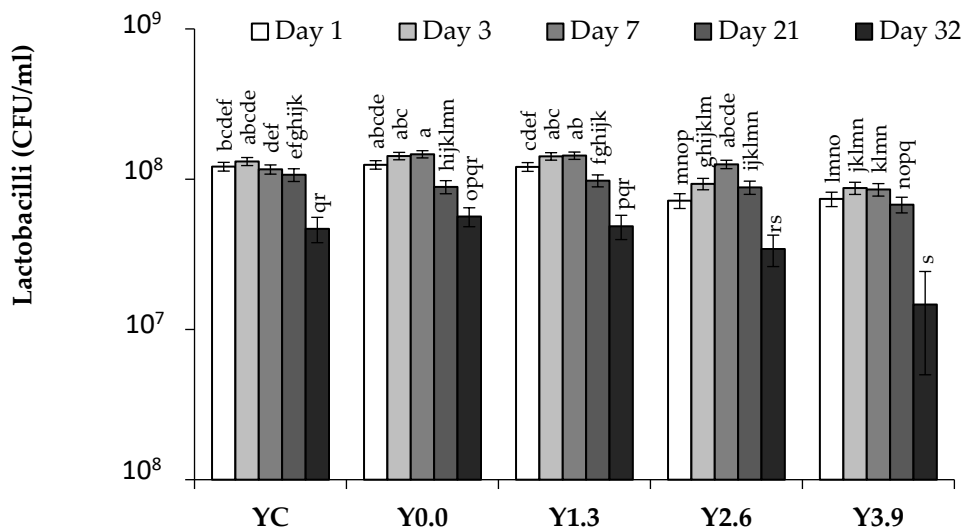

**Figure S1:** Lactobacilli population evolution during storage of non-fat stirred yogurt standardized at 14 % (YC) or 16.5 % (Y0.0) total solids; and for yogurt standardized at 16.5 % total solids and 1.3 % (Y1.3), 2.6 % (Y2.6), 3.9 % (Y3.9) fat content. Different letters (a, b, ..., s) indicate significative statistical differences ( $P < 0.05$ ). Bars represent the standard error of the mean ( $n=4$ ).

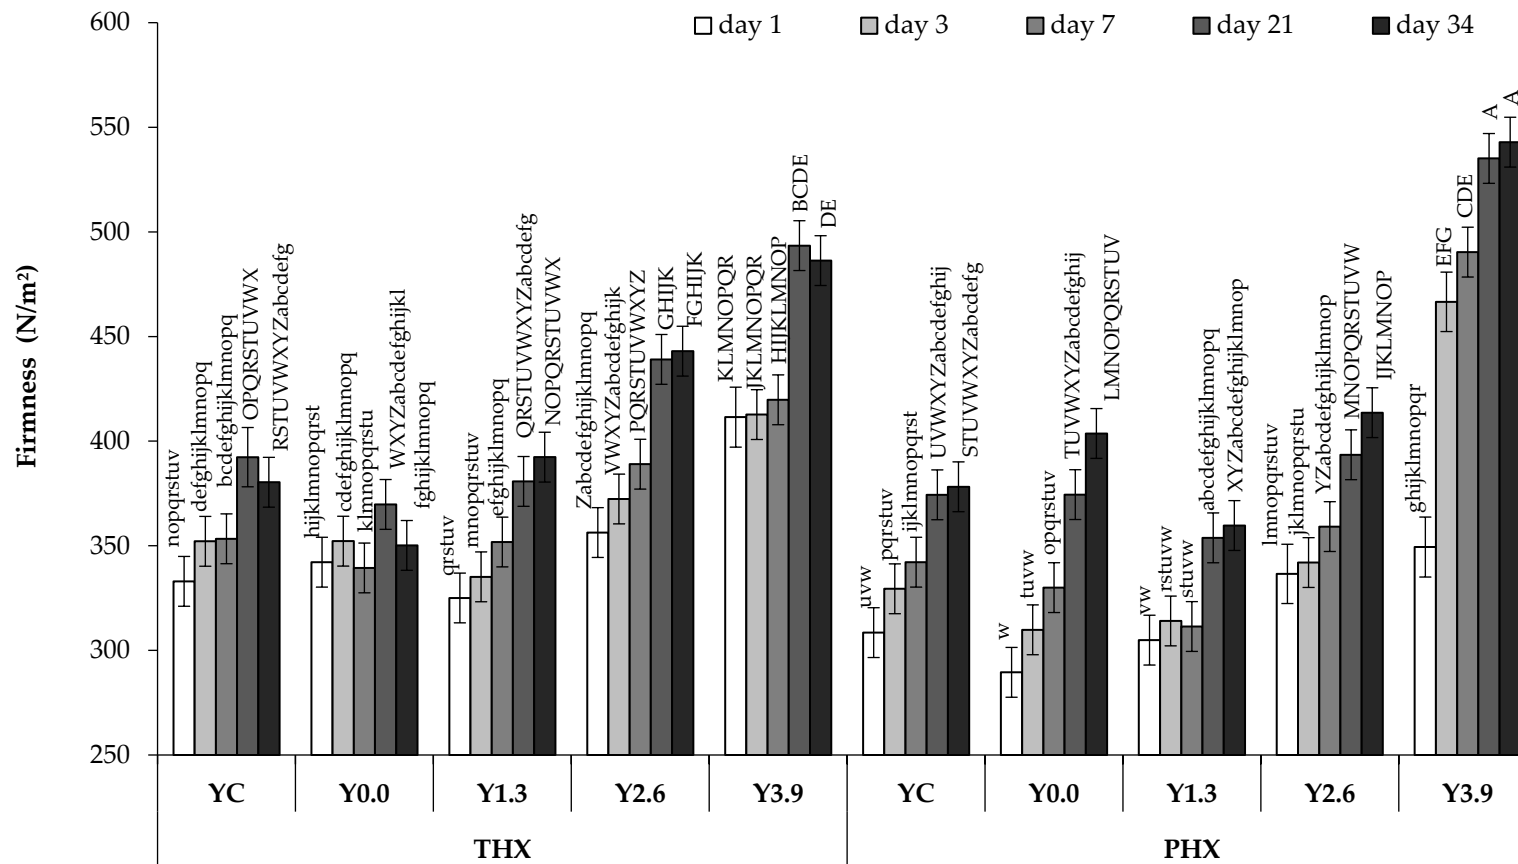

**Figure S2:** Stirred yogurt firmness evolution depending on storage time and standardization (non-fat stirred yogurt standardized at 14 % [YC] or 16.5 % [Y0.0] total solids; yogurt standardized at 16.5 % total solids and 1.3 % [Y1.3], 2.6 % [Y2.6], 3.9 % [Y3.9] fat content), and the cooling device used during stirring/smoothing process (tubular heat exchanger [THX], plate heat exchanger [PHX]). Different letters and a,b,...,z and A, ..., Z indicate significative statistical differences ( $P < 0.05$ ). Bars represent the standard error to the mean ( $n=4$ ).
